# Supplementary material
Source: MDPI journal article supplement (https://www.mdpi.com/2073-4425/8/12/357)
Supplement: s1 [file s1]

[illegible]
