# Supplementary figures and images for: Non-Additive Transcriptomic Responses to Inoculation with Rhizobia in a Young Allopolyploid Compared with Its Diploid Progenitors
Source: MDPI journal article supplement (doi:10.3390/genes8120357), 2017-11-30

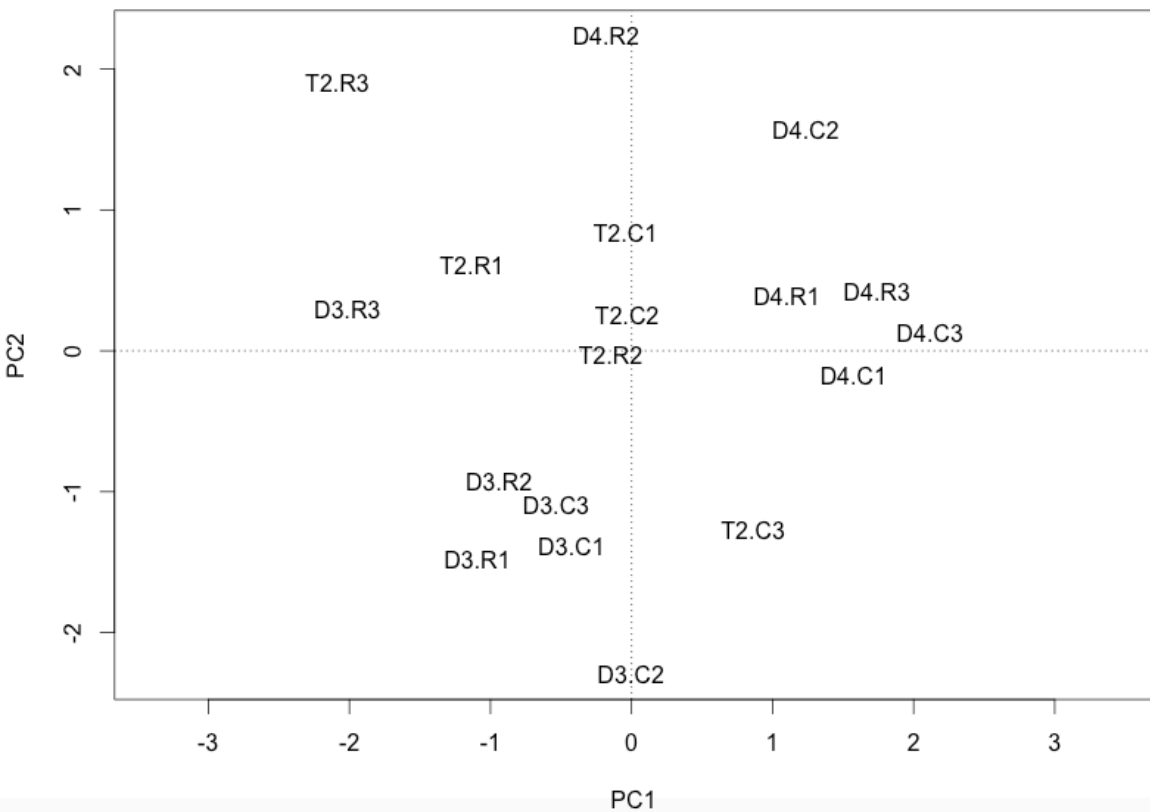

Supplement: s1 [file s1]

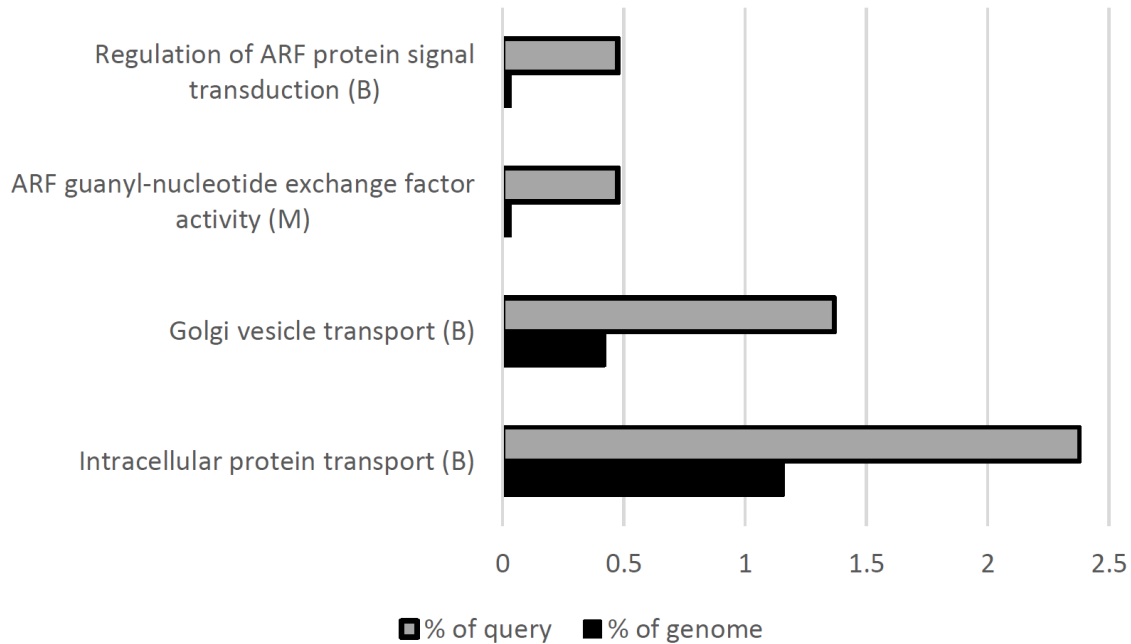

Supplement: s1 [file s1]

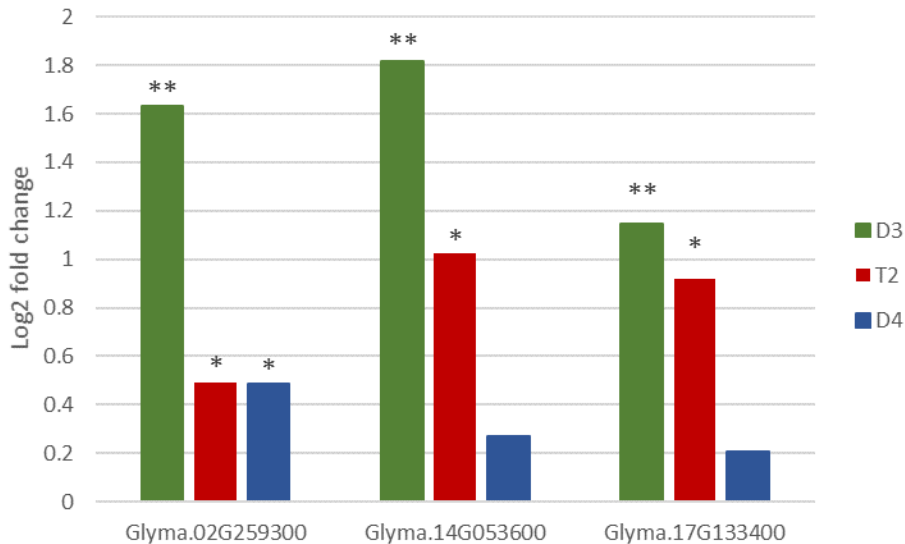

Supplement: s1 [file s1]

Block 1

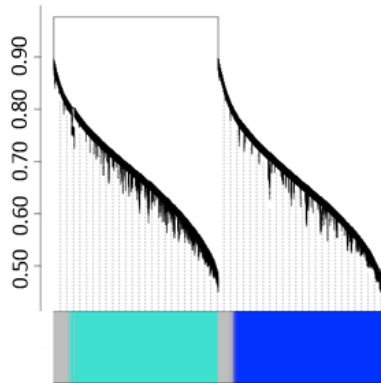

Block 2

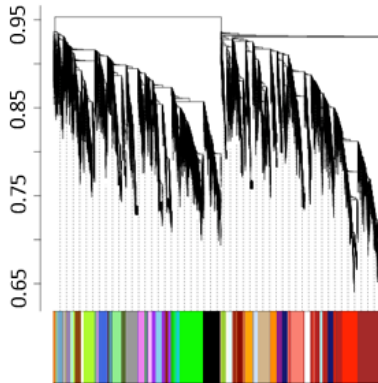

Block 3

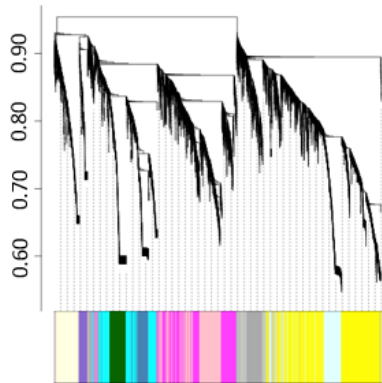

Supplement: s1 [file s1]

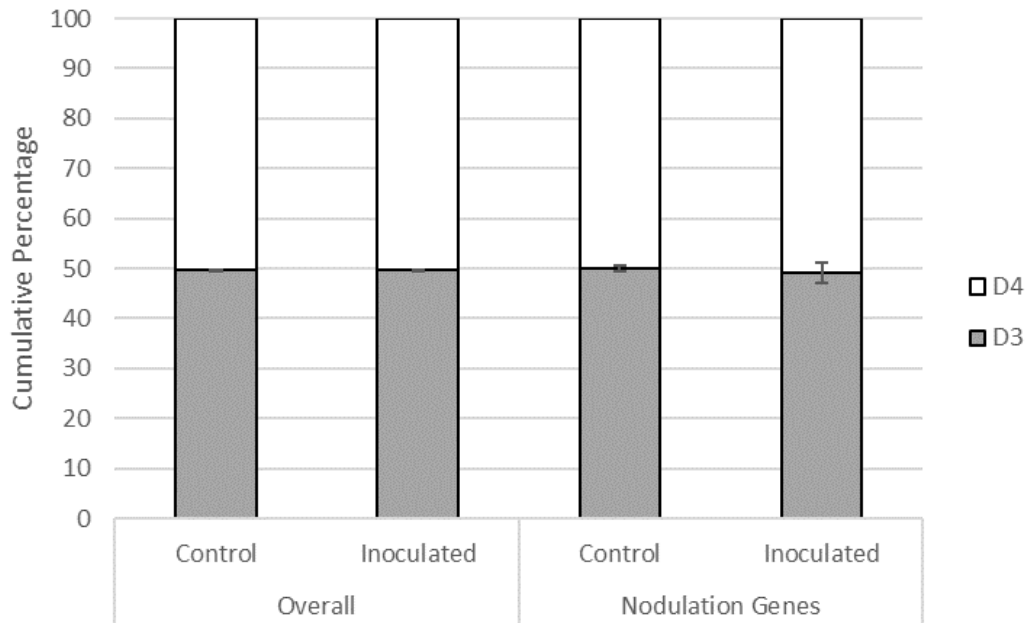

Supplement: s1 [file s1]

**cor=0.5, p=1.6e-113**

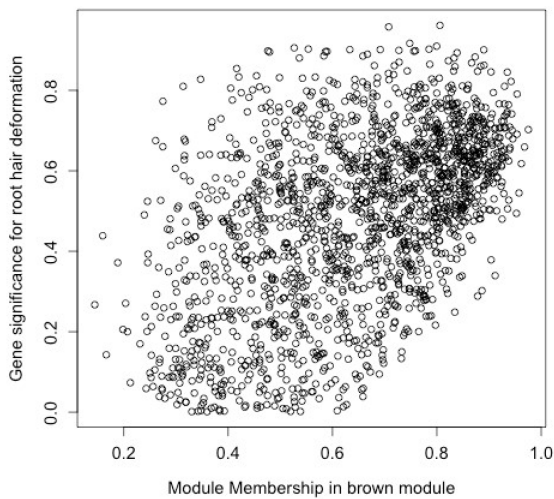

**cor=0.33, p=1.2e-36**

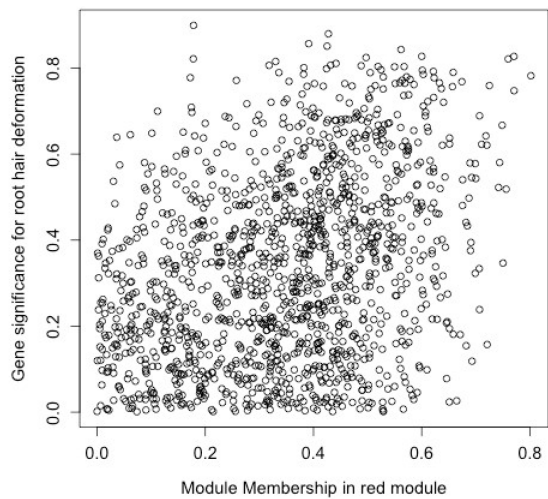

**cor=0.26, p=3.7e-17**

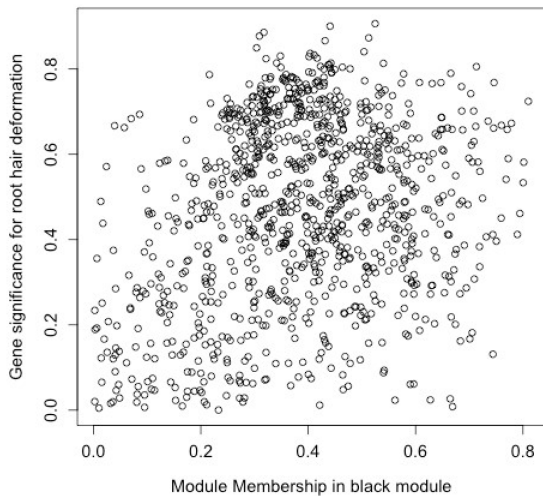

**cor=0.36, p=9.3e-48**

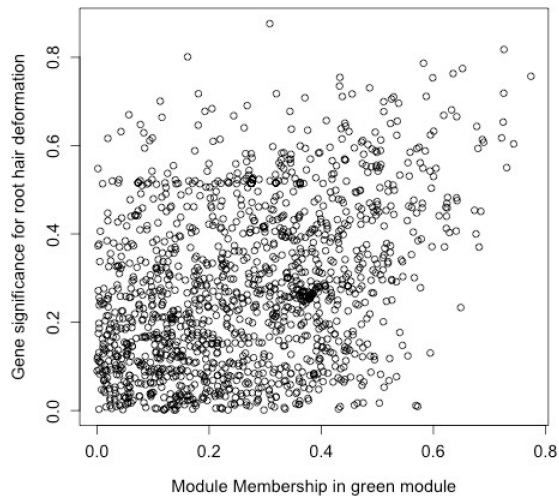

**cor=-0.056, p=0.39**

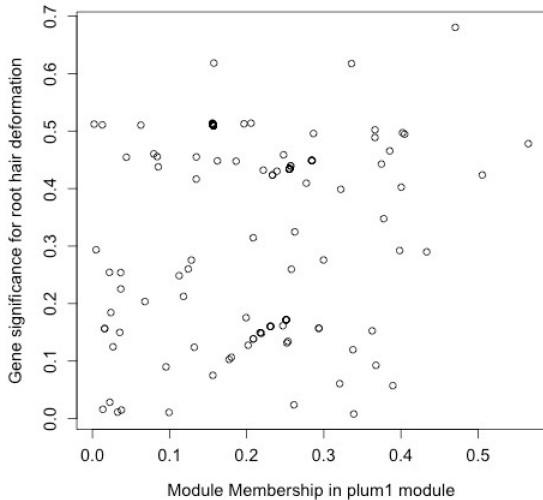

**cor=0.086, p=0.045**

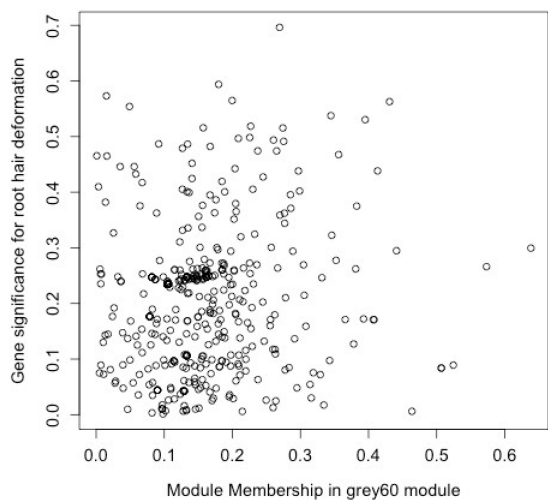

Supplement: s1 [file s1]

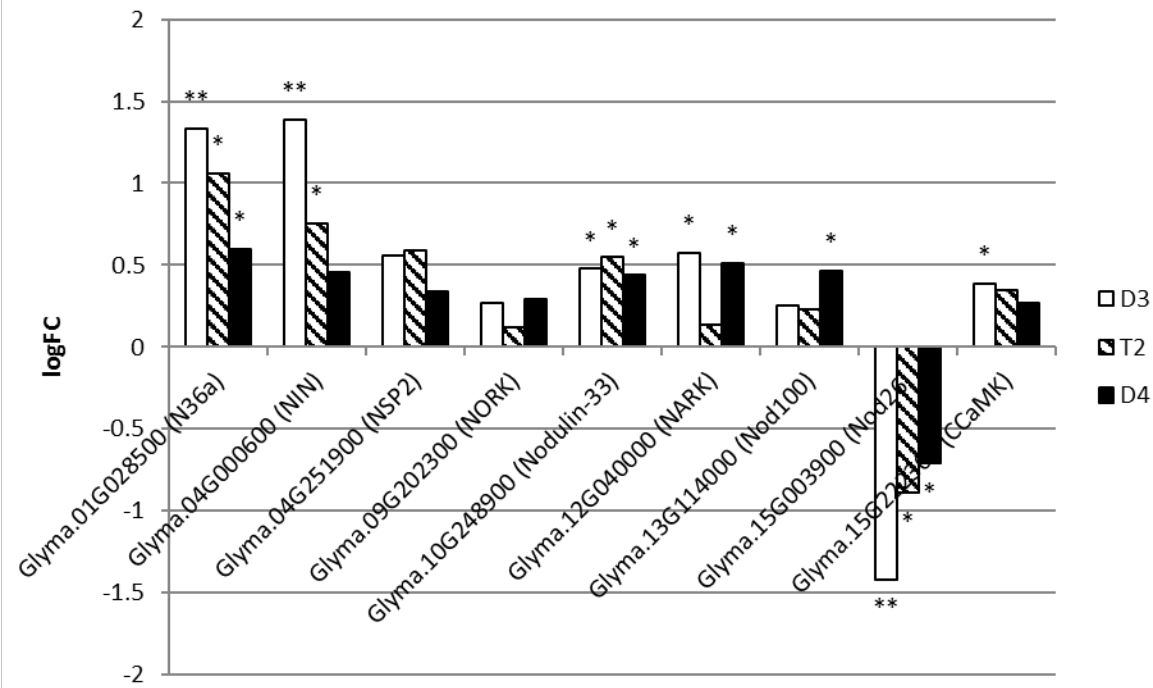

Supplement: s1 [file s1]
